# Supplementary figures and images for: Granulocyte-colony stimulating factor improves outcome in a mouse model of amyotrophic lateral sclerosis
Source: PubMed Central journal article supplement — Brain. 2008 Oct 3;131(12):3335–47. doi: 10.1093/brain/awn243 (PMC2639207; doi:10.1093/brain/awn243), 2008-10-03

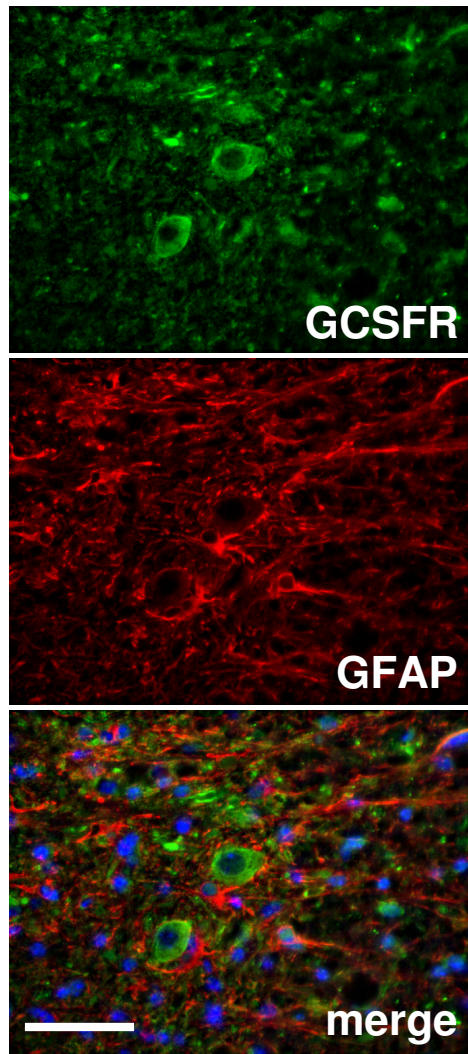

**Supplementary Figure 1**

Supplement: awn243_1.pdf [file awn243_1.pdf]

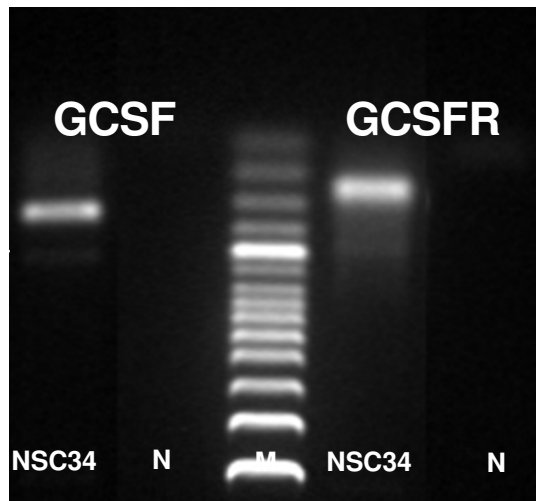

**Supplementary Figure 2**

Supplement: awn243_2.pdf [file awn243_2.pdf]

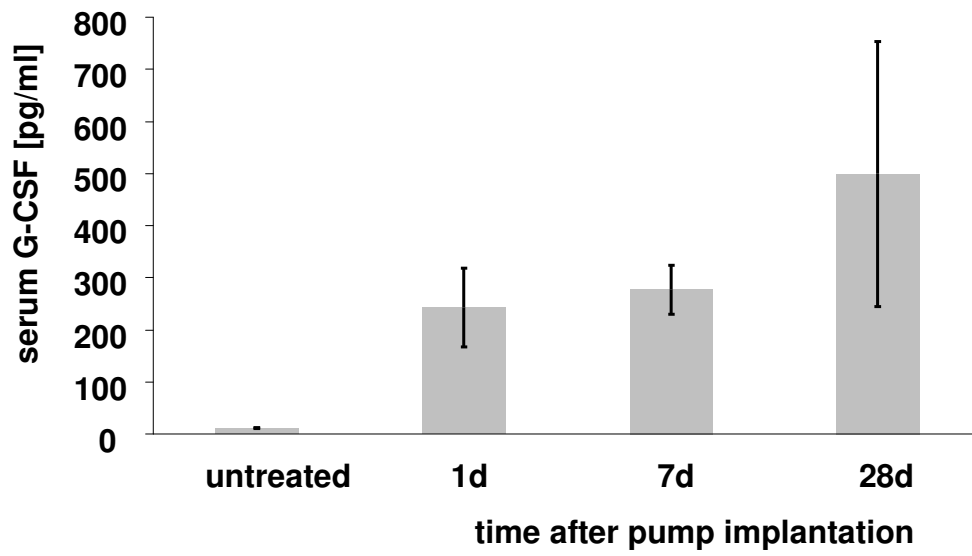

**Supplementary Figure 3**

Supplement: awn243_3.pdf [file awn243_3.pdf]

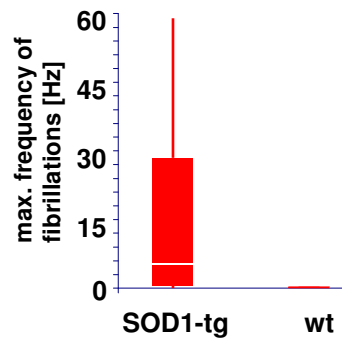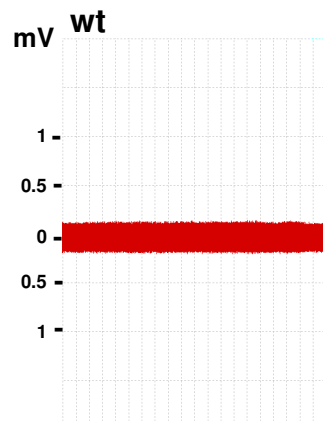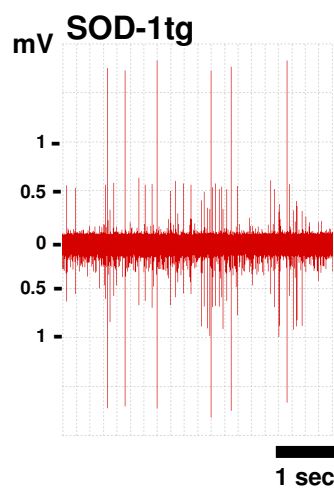

**Supplementary Figure 4**

Supplement: awn243_4.pdf [file awn243_4.pdf]

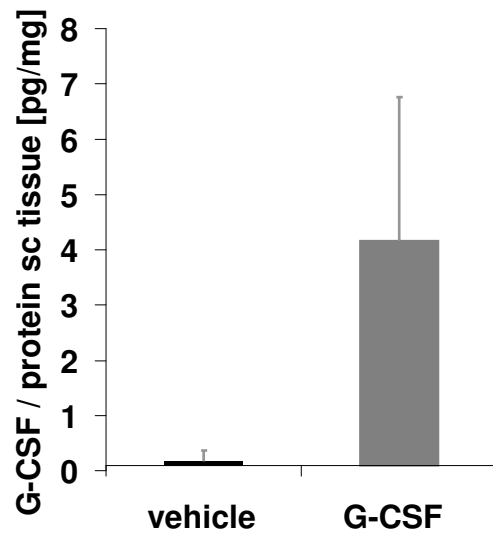

**Supplementary Figure 5**

Supplement: awn243_5.pdf [file awn243_5.pdf]

**A**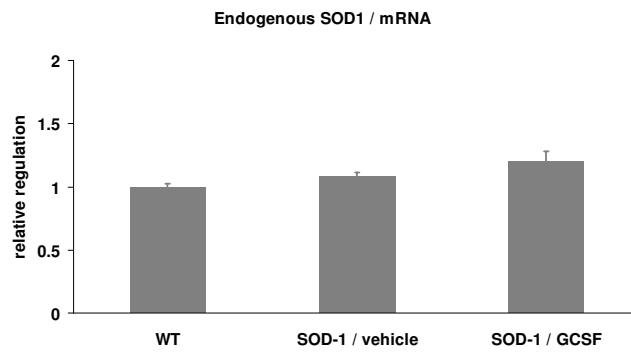**B**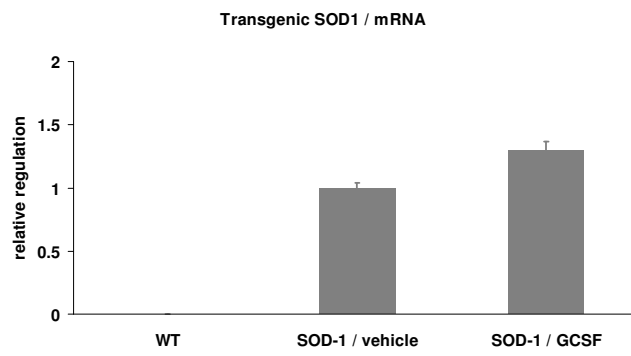**C**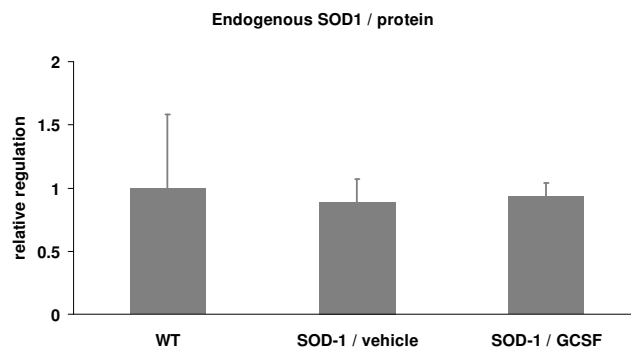**D**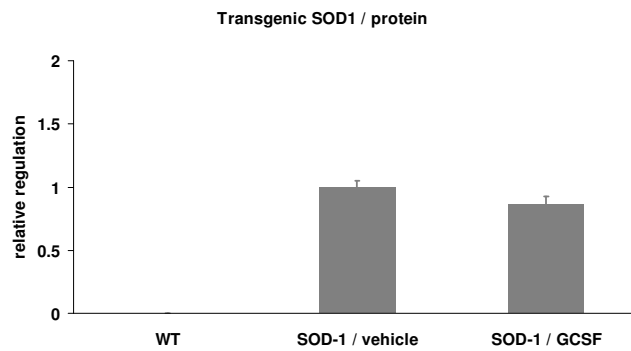**Supplementary Figure 6**

Supplement: awn243_6.pdf [file awn243_6.pdf]

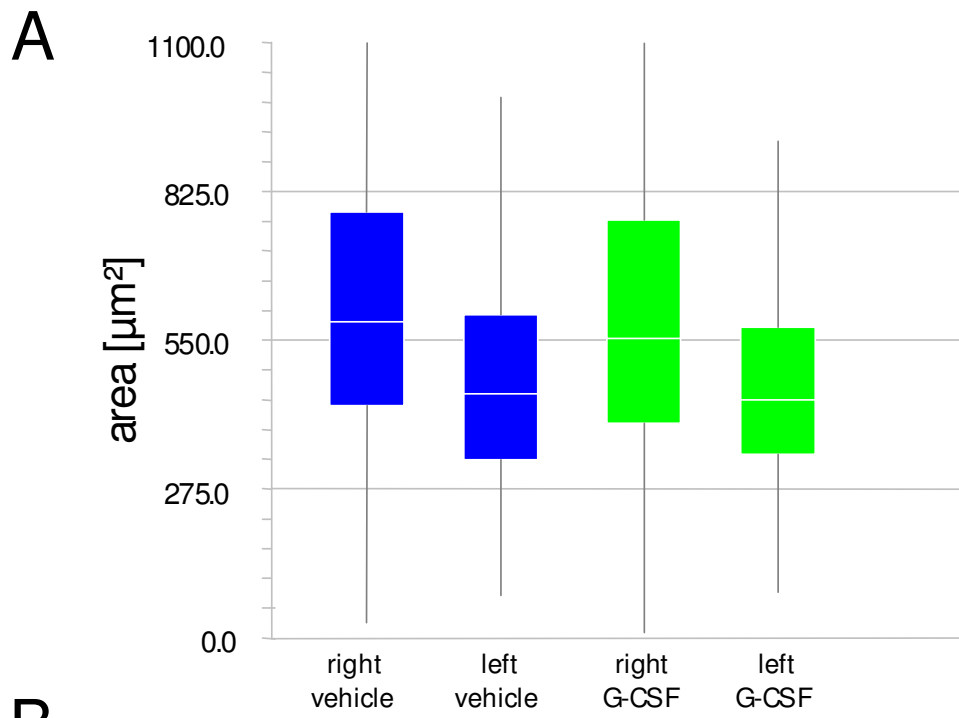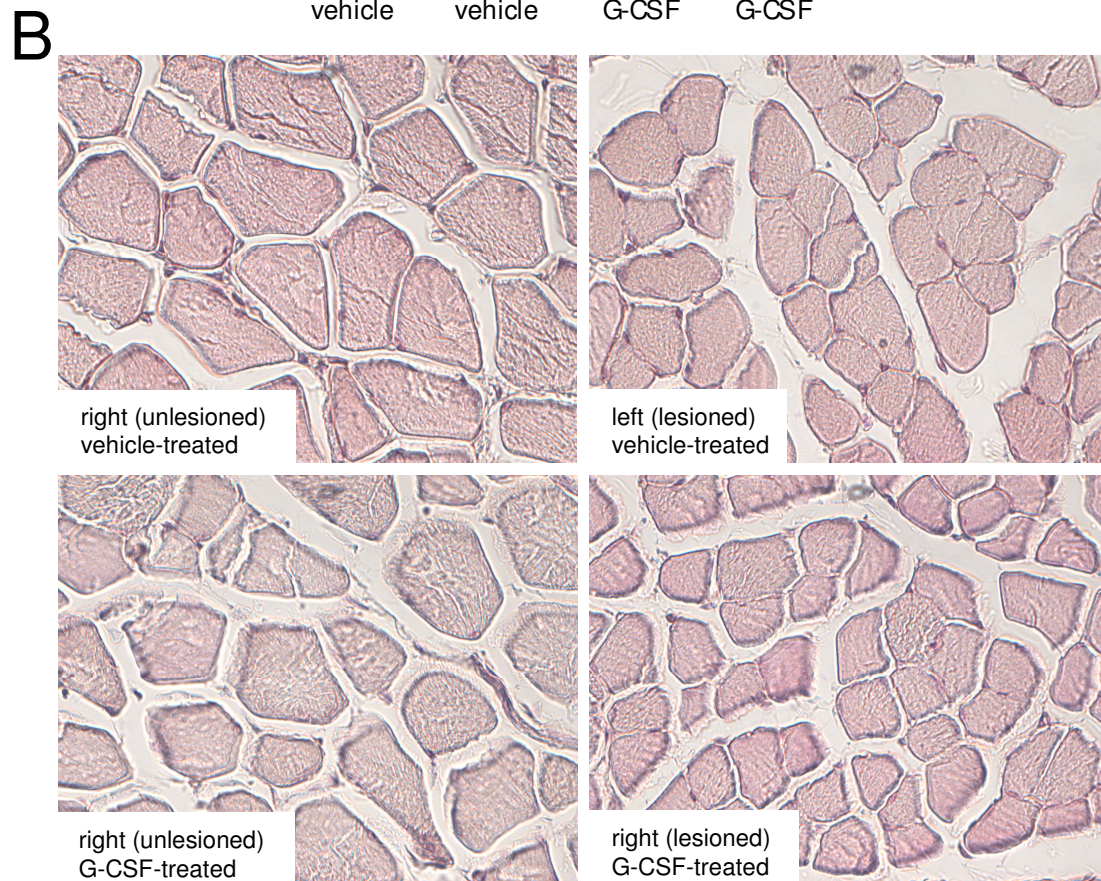

**Supplementary Figure 7**

Supplement: awn243_7.pdf [file awn243_7.pdf]

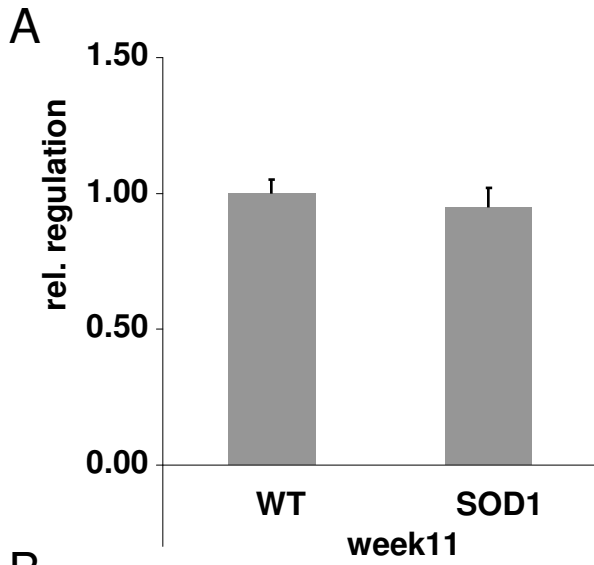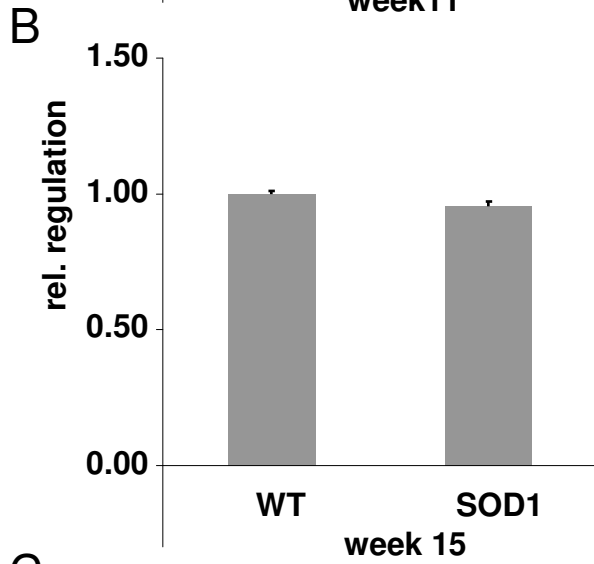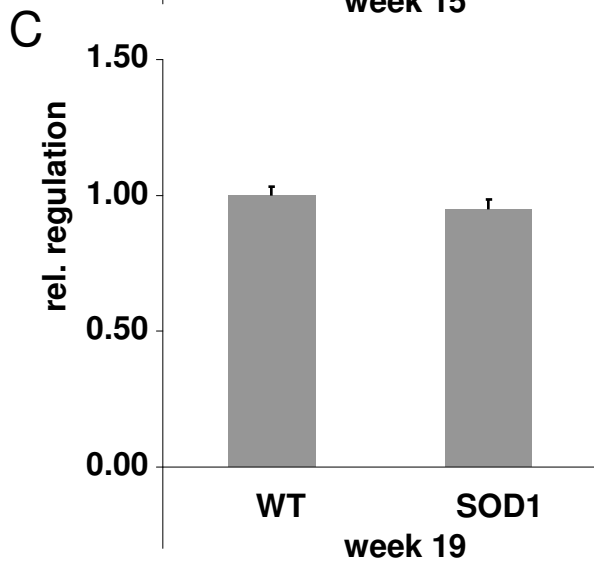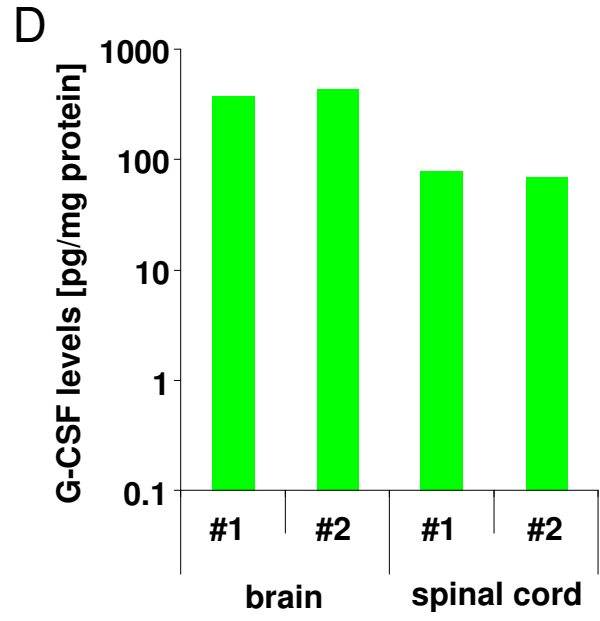

**Supplementary Figure 8**

Supplement: awn243_8.pdf [file awn243_8.pdf]
